# Supplementary material for: Enhanced electromagnetic wave absorption of Fe3O4@MnO2@Ni–Co/C composites derived from Prussian blue analogues
Source: Royal Society of Chemistry journal article supplement (doi:10.1039/d3nr00868a), 2023-01-01
Supplement: d3nr00868a1.pdf [file d3nr00868a1.pdf]

# Enhanced electromagnetic wave absorption of $\text{Fe}_3\text{O}_4@\text{MnO}_2@\text{Ni-Co}/\text{C}$ composites derived from prussian blue analogues

Huanhuan Wang, Qi Qu, Jiangshan Gao\*, Yan He\*

College of Electromechanical Engineering, Shandong Engineering Laboratory for  
Preparation and Application of High-performance Carbon Materials, Qingdao  
University of Science and Technology, Qingdao 266061, China

Co-corresponding author: Yan He, Email: gaojs@qust.edu.cn

Jiangshan Gao, Email: heyan@qust.edu.cn

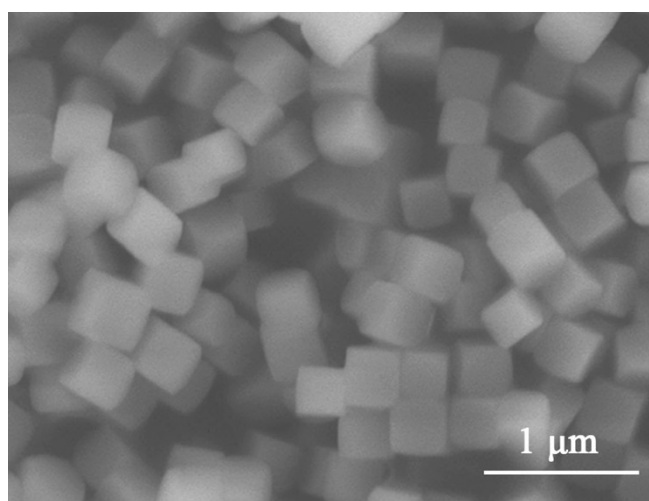

Figure S1. SEM images of Ni-Co/C nanocubes.

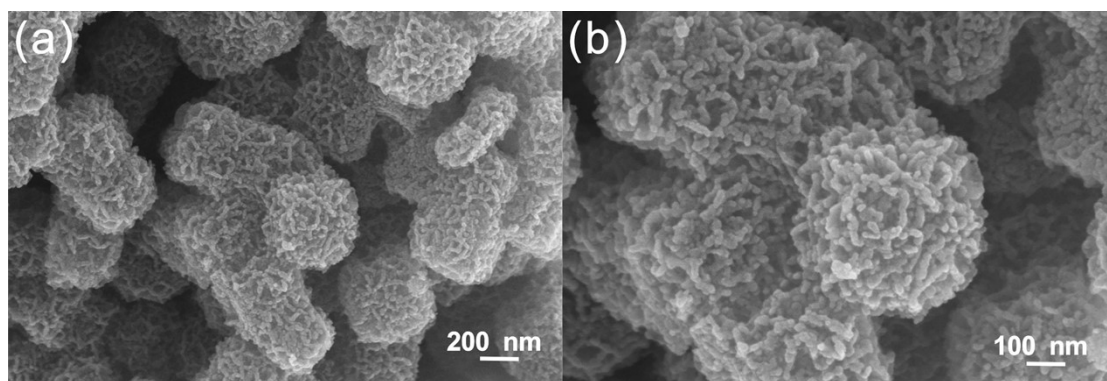

Figure S2. SEM images of  $\text{Fe}_3\text{O}_4@\text{MnO}_2@\text{Ni-Co}/\text{C}$  at high magnification.

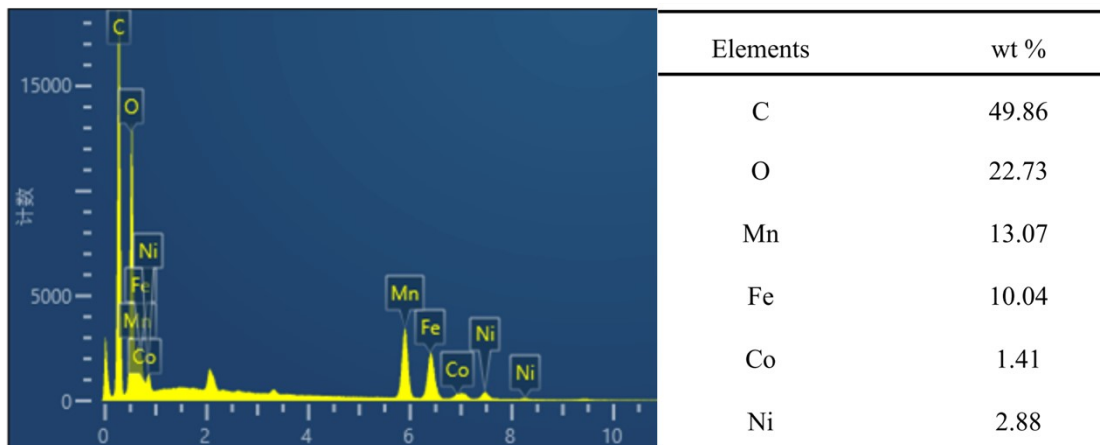

Figure S3. EDS spectra and elements content of  $\text{Fe}_3\text{O}_4@\text{MnO}_2@\text{Ni-Co/C}$ .

Table S1.

Physical pore parameters of  $\text{MnO}_2@\text{Ni-Co/C}$  and  $\text{Fe}_3\text{O}_4@\text{MnO}_2@\text{Ni-Co/C}$  composites.

| Samples                                             | SSA ( $\text{m}^2 \text{g}^{-1}$ ) | $V_{\text{pore}}$ ( $\text{cm}^3 \text{g}^{-1}$ ) | $S_{\text{pore}}$ (nm) |
|-----------------------------------------------------|------------------------------------|---------------------------------------------------|------------------------|
| $\text{MnO}_2@\text{Ni-Co/C}$                       | 42.86                              | 0.0146                                            | 102.65                 |
| $\text{Fe}_3\text{O}_4@\text{MnO}_2@\text{Ni-Co/C}$ | 81.07                              | 0.0282                                            | 66.32                  |
